# Supplementary material for: Effects of combining two techniques of non-invasive brain stimulation in subacute stroke patients: a pilot study
Source: PubMed Central journal article supplement (PMC8928603; doi:10.1186/s12883-022-02607-3), 2022-03-17
Supplement: 12883_2022_2607_MOESM1_ESM.pdf [file 12883_2022_2607_MOESM1_ESM.pdf]

|                 |                             |       |      |       |       |      |           |          |           |          |
|-----------------|-----------------------------|-------|------|-------|-------|------|-----------|----------|-----------|----------|
| <b>Age</b>      | Equal variances assumed     | .439  | .526 | -.038 | 8     | .971 | -.40000   | 10.57733 | -24.79138 | 23.99138 |
|                 | Equal variances not assumed |       |      | -.038 | 7.931 | .971 | -.40000   | 10.57733 | -24.82811 | 24.02811 |
| <b>Duration</b> | Equal variances assumed     | .042  | .843 | -.824 | 8     | .434 | -12.20000 | 14.80878 | -46.34911 | 21.94911 |
|                 | Equal variances not assumed |       |      | -.824 | 7.839 | .434 | -12.20000 | 14.80878 | -46.47151 | 22.07151 |
| <b>MRC-UE</b>   | Equal variances assumed     | 8.511 | .019 | .577  | 8     | .580 | .60000    | 1.03923  | -1.79647  | 2.99647  |
|                 | Equal variances not assumed |       |      | .577  | 6.113 | .584 | .60000    | 1.03923  | -1.93153  | 3.13153  |
| <b>MRC-LE</b>   | Equal variances assumed     | 2.420 | .158 | -.784 | 8     | .455 | -.80000   | 1.01980  | -3.15167  | 1.55167  |
|                 | Equal variances not assumed |       |      | -.784 | 7.144 | .458 | -.80000   | 1.01980  | -3.20164  | 1.60164  |
| <b>BS-ARM</b>   | Equal variances assumed     | 1.440 | .264 | .632  | 8     | .545 | .40000    | .63246   | -1.05845  | 1.85845  |
|                 | Equal variances not assumed |       |      | .632  | 7.692 | .545 | .40000    | .63246   | -1.06866  | 1.86866  |
| <b>BS-HAND</b>  | Equal variances assumed     | .171  | .690 | -.272 | 8     | .792 | -.20000   | .73485   | -1.89456  | 1.49456  |
|                 | Equal variances not assumed |       |      | -.272 | 7.496 | .793 | -.20000   | .73485   | -1.91459  | 1.51459  |
| <b>FMA-UE</b>   | Equal variances assumed     | .040  | .847 | .242  | 8     | .815 | 2.00000   | 8.27164  | -17.07443 | 21.07443 |
|                 | Equal variances not assumed |       |      | .242  | 7.971 | .815 | 2.00000   | 8.27164  | -17.08636 | 21.08636 |

|                  |                             |       |      |       |       |      |          |          |           |          |
|------------------|-----------------------------|-------|------|-------|-------|------|----------|----------|-----------|----------|
| <b>WMFT-FAS</b>  | Equal variances assumed     | .564  | .474 | .023  | 8     | .982 | .20000   | 8.51469  | -19.43492 | 19.83492 |
|                  | Equal variances not assumed |       |      | .023  | 7.556 | .982 | .20000   | 8.51469  | -19.63770 | 20.03770 |
| <b>WMFT-TIME</b> | Equal variances assumed     | 1.237 | .298 | -.112 | 8     | .914 | -1.81600 | 16.21348 | -39.20435 | 35.57235 |
|                  | Equal variances not assumed |       |      | -.112 | 7.138 | .914 | -1.81600 | 16.21348 | -40.00500 | 36.37300 |

*Comment*

Test for differences in age, duration, MRC-UE, MRC-LE, BS-ARM, BS-HAND, FMA-UE, and WMFT via independent t-tests.

| <b>Crosstab</b> |      |                 |               |        |        |
|-----------------|------|-----------------|---------------|--------|--------|
|                 |      |                 | <b>Gender</b> |        |        |
|                 |      |                 | 1.00          | 2.00   | Total  |
| group           | 1.00 | Count           | 1             | 4      | 5      |
|                 |      | % within gender | 50.0%         | 50.0%  | 50.0%  |
|                 | 2.00 | Count           | 1             | 4      | 5      |
|                 |      | % within gender | 50.0%         | 50.0%  | 50.0%  |
| Total           |      | Count           | 2             | 8      | 10     |
|                 |      | % within gender | 100.0%        | 100.0% | 100.0% |

| <b>Chi-Square Tests</b>            |                   |    |                                   |                      |                      |
|------------------------------------|-------------------|----|-----------------------------------|----------------------|----------------------|
|                                    | Value             | df | Asymptotic Significance (2-sided) | Exact Sig. (2-sided) | Exact Sig. (1-sided) |
| Pearson Chi-Square                 | .000 <sup>a</sup> | 1  | 1.000                             |                      |                      |
| Continuity Correction <sup>b</sup> | .000              | 1  | 1.000                             |                      |                      |
| Likelihood Ratio                   | .000              | 1  | 1.000                             |                      |                      |
| Fisher's Exact Test                |                   |    |                                   | 1.000                | .778                 |
| Linear-by-Linear Association       | .000              | 1  | 1.000                             |                      |                      |
| N of Valid Cases                   | 10                |    |                                   |                      |                      |

a. 4 cells (100.0%) have expected count less than 5. The minimum expected count is 1.00.

b. Computed only for a 2x2 table

| Crosstab |      |               |                |        |        |
|----------|------|---------------|----------------|--------|--------|
|          |      |               | Type of stroke |        | Total  |
|          |      |               | 1.00           | 2.00   |        |
| group    | 1.00 | Count         | 4              | 1      | 5      |
|          |      | % within type | 50.0%          | 50.0%  | 50.0%  |
|          | 2.00 | Count         | 4              | 1      | 5      |
|          |      | % within type | 50.0%          | 50.0%  | 50.0%  |
| Total    |      | Count         | 8              | 2      | 10     |
|          |      | % within type | 100.0%         | 100.0% | 100.0% |

| Chi-Square Tests                   |                   |    |                                         |                         |                         |
|------------------------------------|-------------------|----|-----------------------------------------|-------------------------|-------------------------|
|                                    | Value             | df | Asymptotic<br>Significance<br>(2-sided) | Exact Sig.<br>(2-sided) | Exact Sig.<br>(1-sided) |
| Pearson Chi-Square                 | .000 <sup>a</sup> | 1  | 1.000                                   |                         |                         |
| Continuity Correction <sup>b</sup> | .000              | 1  | 1.000                                   |                         |                         |
| Likelihood Ratio                   | .000              | 1  | 1.000                                   |                         |                         |
| Fisher's Exact Test                |                   |    |                                         | 1.000                   | .778                    |
| Linear-by-Linear<br>Association    | .000              | 1  | 1.000                                   |                         |                         |
| N of Valid Cases                   | 10                |    |                                         |                         |                         |

a. 4 cells (100.0%) have expected count less than 5. The minimum expected count is 1.00.

b. Computed only for a 2x2 table

| Crosstab |      |               |                      |        |        |
|----------|------|---------------|----------------------|--------|--------|
|          |      |               | Side of brain lesion |        | Total  |
|          |      |               | 1.00                 | 2.00   |        |
| group    | 1.00 | Count         | 3                    | 2      | 5      |
|          |      | % within side | 50.0%                | 50.0%  | 50.0%  |
|          | 2.00 | Count         | 3                    | 2      | 5      |
|          |      | % within side | 50.0%                | 50.0%  | 50.0%  |
| Total    |      | Count         | 6                    | 4      | 10     |
|          |      | % within side | 100.0%               | 100.0% | 100.0% |

| Chi-Square Tests |       |    |                                         |                         |                         |
|------------------|-------|----|-----------------------------------------|-------------------------|-------------------------|
|                  | Value | df | Asymptotic<br>Significance<br>(2-sided) | Exact Sig.<br>(2-sided) | Exact Sig.<br>(1-sided) |

|                                                                                          |                   |   |       |       |      |
|------------------------------------------------------------------------------------------|-------------------|---|-------|-------|------|
| Pearson Chi-Square                                                                       | .000 <sup>a</sup> | 1 | 1.000 |       |      |
| Continuity Correction <sup>b</sup>                                                       | .000              | 1 | 1.000 |       |      |
| Likelihood Ratio                                                                         | .000              | 1 | 1.000 |       |      |
| Fisher's Exact Test                                                                      |                   |   |       | 1.000 | .738 |
| Linear-by-Linear Association                                                             | .000              | 1 | 1.000 |       |      |
| N of Valid Cases                                                                         | 10                |   |       |       |      |
| a. 4 cells (100.0%) have expected count less than 5. The minimum expected count is 2.00. |                   |   |       |       |      |
| b. Computed only for a 2x2 table                                                         |                   |   |       |       |      |

| Crosstab |      |                    |           |        |        |        |        |
|----------|------|--------------------|-----------|--------|--------|--------|--------|
|          |      |                    | Education |        |        |        |        |
|          |      |                    | 1.00      | 2.00   | 3.00   | 4.00   | Total  |
| group    | 1.00 | Count              | 2         | 2      | 0      | 1      | 5      |
|          |      | % within education | 50.0%     | 100.0% | 0.0%   | 33.3%  | 50.0%  |
|          | 2.00 | Count              | 2         | 0      | 1      | 2      | 5      |
|          |      | % within education | 50.0%     | 0.0%   | 100.0% | 66.7%  | 50.0%  |
| Total    |      | Count              | 4         | 2      | 1      | 3      | 10     |
|          |      | % within education | 100.0%    | 100.0% | 100.0% | 100.0% | 100.0% |

| Chi-Square Tests                                                                        |                    |    |                                   |
|-----------------------------------------------------------------------------------------|--------------------|----|-----------------------------------|
|                                                                                         | Value              | df | Asymptotic Significance (2-sided) |
| Pearson Chi-Square                                                                      | 3.333 <sup>a</sup> | 3  | .343                              |
| Likelihood Ratio                                                                        | 4.499              | 3  | .212                              |
| Linear-by-Linear Association                                                            | .503               | 1  | .478                              |
| N of Valid Cases                                                                        | 10                 |    |                                   |
| a. 8 cells (100.0%) have expected count less than 5. The minimum expected count is .50. |                    |    |                                   |

Group 1 = active, Group 2 = sham

### Comment

Use frequency to describe and test for differences in gender, type of stroke, side of brain lesion, and education via Chi-square and Fisher's Exact tests.

### Supplementary 2. Distribution of the Normalization Test

| Tests of Normality        |       |                                 |    |       |              |    |      |
|---------------------------|-------|---------------------------------|----|-------|--------------|----|------|
|                           | Group | Kolmogorov-Smirnov <sup>a</sup> |    |       | Shapiro-Wilk |    |      |
|                           |       | Statistic                       | df | Sig.  | Statistic    | df | Sig. |
| <b>FMA-UE before</b>      | 1     | .334                            | 5  | .072  | .813         | 5  | .103 |
|                           | 2     | .255                            | 5  | .200* | .828         | 5  | .134 |
| <b>FMA-UE immediately</b> | 1     | .323                            | 5  | .096  | .812         | 5  | .101 |
|                           | 2     | .253                            | 5  | .200* | .822         | 5  | .120 |
| <b>FMA-UE 1 week</b>      | 1     | .299                            | 5  | .165  | .806         | 5  | .090 |
|                           | 2     | .259                            | 5  | .200* | .790         | 5  | .067 |

| Tests of Normality          |       |                                 |    |       |              |    |      |
|-----------------------------|-------|---------------------------------|----|-------|--------------|----|------|
|                             | Group | Kolmogorov-Smirnov <sup>a</sup> |    |       | Shapiro-Wilk |    |      |
|                             |       | Statistic                       | df | Sig.  | Statistic    | df | Sig. |
| <b>WMFT-FAS before</b>      | 1     | .336                            | 5  | .067  | .795         | 5  | .074 |
|                             | 2     | .228                            | 5  | .200* | .883         | 5  | .325 |
| <b>WMFT-FAS immediately</b> | 1     | .275                            | 5  | .200* | .865         | 5  | .246 |
|                             | 2     | .232                            | 5  | .200* | .887         | 5  | .342 |
| <b>WMFT-FAS 1 week</b>      | 1     | .268                            | 5  | .200* | .882         | 5  | .318 |
|                             | 2     | .249                            | 5  | .200* | .874         | 5  | .283 |

| Tests of Normality           |       |                                 |    |       |              |    |      |
|------------------------------|-------|---------------------------------|----|-------|--------------|----|------|
|                              | Group | Kolmogorov-Smirnov <sup>a</sup> |    |       | Shapiro-Wilk |    |      |
|                              |       | Statistic                       | df | Sig.  | Statistic    | df | Sig. |
| <b>WMFT-TIME before</b>      | 1     | .318                            | 5  | .108  | .804         | 5  | .087 |
|                              | 2     | .247                            | 5  | .200* | .819         | 5  | .114 |
| <b>WMFT-TIME immediately</b> | 1     | .248                            | 5  | .200* | .876         | 5  | .291 |
|                              | 2     | .256                            | 5  | .200* | .794         | 5  | .073 |
| <b>WMFT-TIME 1 week</b>      | 1     | .242                            | 5  | .200* | .869         | 5  | .263 |
|                              | 2     | .256                            | 5  | .200* | .795         | 5  | .073 |

Group 1 = active, Group 2 = sham

### Comment

Data distribution testing, using the Shapiro-Wilk test, showed that the averages of FMA-UE, WMFT-FAS, and WMFT-TIME at three-time assessments were in a normal distribution.

### Supplementary 3. The 2-way mixed ANOVA of FMA-UE

| Mauchly's Test of Sphericity <sup>a</sup> |             |                    |    |      |                      |             |             |
|-------------------------------------------|-------------|--------------------|----|------|----------------------|-------------|-------------|
| Measure: <b>FMA-UE</b>                    |             |                    |    |      |                      |             |             |
| Within Subjects Effect                    | Mauchly's W | Approx. Chi-Square | df | Sig. | Epsilon <sup>b</sup> |             |             |
|                                           |             |                    |    |      | Greenhouse-Geisser   | Huynh-Feldt | Lower-bound |
| factor1                                   | .745        | 2.064              | 2  | .356 | .797                 | 1.000       | .500        |

*factor 1 = FMA-UE*

#### Comment

Mauchly's Test of Sphericity indicated that the assumption of sphericity had not been violated,  $\chi^2(2) = 2.06$ ,  $p = 0.36$ .

| Tests of Within-Subjects Effects |                    |                         |        |             |        |      |
|----------------------------------|--------------------|-------------------------|--------|-------------|--------|------|
| Measure: <b>FMA-UE</b>           |                    |                         |        |             |        |      |
| Source                           |                    | Type III Sum of Squares | df     | Mean Square | F      | Sig. |
| factor1                          | Sphericity Assumed | 176.067                 | 2      | 88.033      | 27.439 | .000 |
|                                  | Greenhouse-Geisser | 176.067                 | 1.593  | 110.514     | 27.439 | .000 |
|                                  | Huynh-Feldt        | 176.067                 | 2.000  | 88.033      | 27.439 | .000 |
|                                  | Lower-bound        | 176.067                 | 1.000  | 176.067     | 27.439 | .001 |
| factor1 * Group                  | Sphericity Assumed | 85.267                  | 2      | 42.633      | 13.288 | .000 |
|                                  | Greenhouse-Geisser | 85.267                  | 1.593  | 53.521      | 13.288 | .001 |
|                                  | Huynh-Feldt        | 85.267                  | 2.000  | 42.633      | 13.288 | .000 |
|                                  | Lower-bound        | 85.267                  | 1.000  | 85.267      | 13.288 | .007 |
| Error(factor1)                   | Sphericity Assumed | 51.333                  | 16     | 3.208       |        |      |
|                                  | Greenhouse-Geisser | 51.333                  | 12.745 | 4.028       |        |      |
|                                  | Huynh-Feldt        | 51.333                  | 16.000 | 3.208       |        |      |
|                                  | Lower-bound        | 51.333                  | 8.000  | 6.417       |        |      |

*factor 1 = FMA-UE*

#### Comment

The overall FMA-UE motor score was statistically significant across three-time points,  $F(2,16) = 27.44$ ,  $p < 0.001$ , a significant interaction between time and group of

experiments,  $F(2,16) = 13.29$ ,  $p < 0.001$  implying that the change in scores over time differed between group assigned.

| Pairwise Comparisons |          |          |                       |            |                   |                                                     |             |
|----------------------|----------|----------|-----------------------|------------|-------------------|-----------------------------------------------------|-------------|
| Measure: FMA-UE      |          |          |                       |            |                   |                                                     |             |
| Group                | (I) time | (J) time | Mean Difference (I-J) | Std. Error | Sig. <sup>b</sup> | 95% Confidence Interval for Difference <sup>b</sup> |             |
|                      |          |          |                       |            |                   | Lower Bound                                         | Upper Bound |
| 1                    | 1        | 2        | -1.600                | .812       | .253              | -4.050                                              | .850        |
|                      |          | 3        | -9.400*               | 1.323      | .000              | -13.389                                             | -5.411      |
|                      | 2        | 1        | 1.600                 | .812       | .253              | -.850                                               | 4.050       |
|                      |          | 3        | -7.800*               | 1.200      | .001              | -11.419                                             | -4.181      |
|                      | 3        | 1        | 9.400*                | 1.323      | .000              | 5.411                                               | 13.389      |
|                      |          | 2        | 7.800*                | 1.200      | .001              | 4.181                                               | 11.419      |
| 2                    | 1        | 2        | -.600                 | .812       | 1.000             | -3.050                                              | 1.850       |
|                      |          | 3        | -1.800                | 1.323      | .632              | -5.789                                              | 2.189       |
|                      | 2        | 1        | .600                  | .812       | 1.000             | -1.850                                              | 3.050       |
|                      |          | 3        | -1.200                | 1.200      | 1.000             | -4.819                                              | 2.419       |
|                      | 3        | 1        | 1.800                 | 1.323      | .632              | -2.189                                              | 5.789       |
|                      |          | 2        | 1.200                 | 1.200      | 1.000             | -2.419                                              | 4.819       |

Group 1 = active, Group 2 = sham, time 1 = at baseline, time 2 = immediately after stimulation, time 3 = 1 week after stimulation

#### Comment

Pairwise comparisons using Bonferroni's adjustment, only FM-UE of the active group had a significantly higher motor score at 1 week after stimulation,  $p < 0.001$ , as compared with the baseline and immediately after stimulation,  $p = 0.001$ .



**Supplementary 4. Profile Plots Effects of Combined NIBS/Sham on FMA-UE**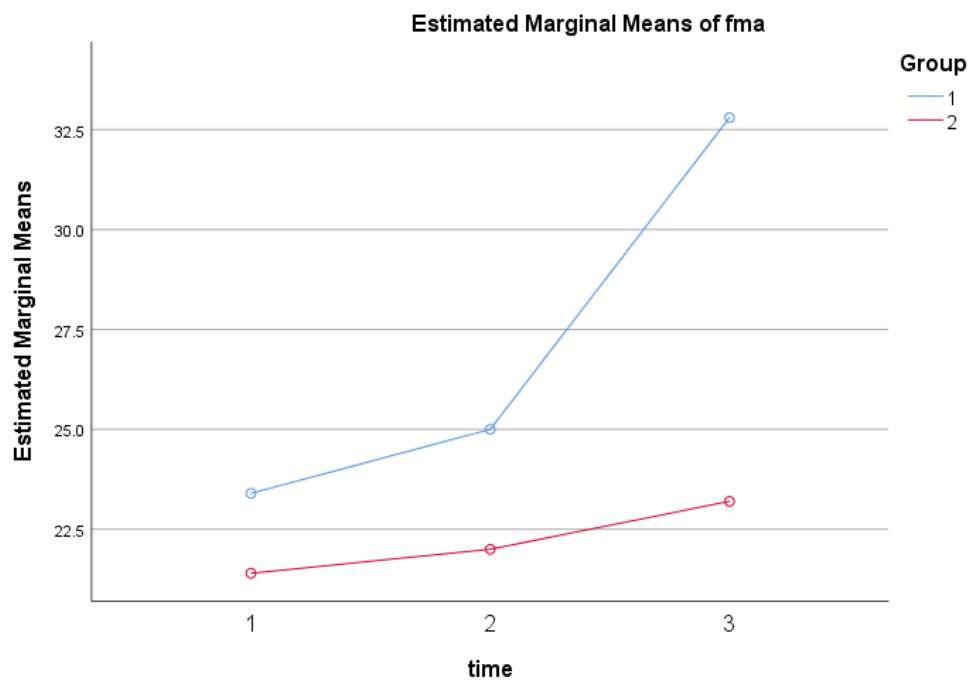

*Group 1 = active, Group 2 = sham, 1 = at baseline, 2 = immediately after stimulation, 3 = 1 week after stimulation*

### Supplementary 5. The 2-way mixed ANOVA of WMFT-FAS

| Mauchly's Test of Sphericity <sup>a</sup> |             |                    |    |      |                      |             |             |
|-------------------------------------------|-------------|--------------------|----|------|----------------------|-------------|-------------|
| Measure: WMFT-FAS                         |             |                    |    |      |                      |             |             |
| Within Subjects Effect                    | Mauchly's W | Approx. Chi-Square | df | Sig. | Epsilon <sup>b</sup> |             |             |
|                                           |             |                    |    |      | Greenhouse-Geisser   | Huynh-Feldt | Lower-bound |
| factor1                                   | .475        | 5.206              | 2  | .074 | .656                 | .831        | .500        |

*factor 1 = WMFT-FAS*

#### Comment

Mauchly's Test of Sphericity indicated that the assumption of sphericity had not been violated,  $\chi^2(2) = 5.21$ ,  $p = 0.07$ .

| Tests of Within-Subjects Effects |                    |                         |        |             |        |      |
|----------------------------------|--------------------|-------------------------|--------|-------------|--------|------|
| Measure: WMFT-FAS                |                    |                         |        |             |        |      |
| Source                           |                    | Type III Sum of Squares | df     | Mean Square | F      | Sig. |
| time                             | Sphericity Assumed | 130.467                 | 2      | 65.233      | 13.879 | .000 |
|                                  | Greenhouse-Geisser | 130.467                 | 1.312  | 99.459      | 13.879 | .002 |
|                                  | Huynh-Feldt        | 130.467                 | 1.662  | 78.488      | 13.879 | .001 |
|                                  | Lower-bound        | 130.467                 | 1.000  | 130.467     | 13.879 | .006 |
| factor1 *<br>Group               | Sphericity Assumed | 31.667                  | 2      | 15.833      | 3.369  | .060 |
|                                  | Greenhouse-Geisser | 31.667                  | 1.312  | 24.141      | 3.369  | .088 |
|                                  | Huynh-Feldt        | 31.667                  | 1.662  | 19.050      | 3.369  | .072 |
|                                  | Lower-bound        | 31.667                  | 1.000  | 31.667      | 3.369  | .104 |
| Error(factor1)                   | Sphericity Assumed | 75.200                  | 16     | 4.700       |        |      |
|                                  | Greenhouse-Geisser | 75.200                  | 10.494 | 7.166       |        |      |
|                                  | Huynh-Feldt        | 75.200                  | 13.298 | 5.655       |        |      |
|                                  | Lower-bound        | 75.200                  | 8.000  | 9.400       |        |      |

*factor 1 = WMFT-FAS*

#### Comment

The 2-way mixed ANOVA was performed. The WMFT-FAS scores were statistically significant in time,  $F(2,16) = 13.88$ ,  $p < 0.001$ . However, the time and group interactions were not statistically significant, even though there was an increase trend towards the experimental group,  $F(2,16) = 3.37$ ,  $p = 0.06$ .

**Supplementary 6. Profile Plots Effects of Combined NIBS/sham on WMFT-FAS**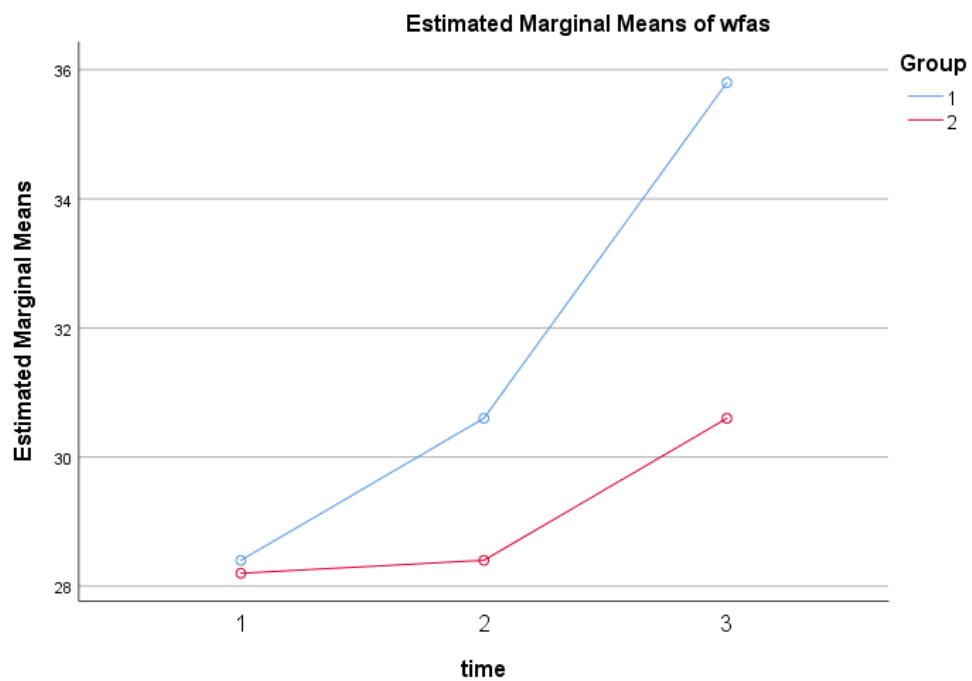

*Group 1 = active, Group 2 = sham, 1 = at baseline, 2 = immediately after stimulation, 3 = 1 week after stimulation*

### Supplementary 7. The 2-way mixed ANOVA of WMFT-TIME

| Mauchly's Test of Sphericity <sup>a</sup> |             |                    |    |      |                      |             |             |
|-------------------------------------------|-------------|--------------------|----|------|----------------------|-------------|-------------|
| Measure: WMFT-TIME                        |             |                    |    |      |                      |             |             |
| Within Subjects Effect                    | Mauchly's W | Approx. Chi-Square | df | Sig. | Epsilon <sup>b</sup> |             |             |
|                                           |             |                    |    |      | Greenhouse-Geisser   | Huynh-Feldt | Lower-bound |
| time                                      | .200        | 11.275             | 2  | .004 | .555                 | .661        | .500        |

factor 1 = WMFT-TIME

*Comment*

Mauchly's Test of Sphericity indicated that the assumption of sphericity is violated,  $\chi^2(2) = 11.27$ ,  $p = 0.004$ . We would prefer to use the lower-bound adjustment by Greenhouse-Geisser due to estimated epsilon ( $\epsilon$ ) is less than 0.75.

| Tests of Within-Subjects Effects |                    |                         |        |             |       |      |
|----------------------------------|--------------------|-------------------------|--------|-------------|-------|------|
| Measure: WMFT-TIME               |                    |                         |        |             |       |      |
| Source                           |                    | Type III Sum of Squares | df     | Mean Square | F     | Sig. |
| factor1                          | Sphericity Assumed | 656.881                 | 2      | 328.441     | 5.148 | .019 |
|                                  | Greenhouse-Geisser | 656.881                 | 1.111  | 591.273     | 5.148 | .047 |
|                                  | Huynh-Feldt        | 656.881                 | 1.322  | 496.759     | 5.148 | .038 |
|                                  | Lower-bound        | 656.881                 | 1.000  | 656.881     | 5.148 | .053 |
| factor1 * Group                  | Sphericity Assumed | 484.381                 | 2      | 242.190     | 3.796 | .045 |
|                                  | Greenhouse-Geisser | 484.381                 | 1.111  | 436.001     | 3.796 | .081 |
|                                  | Huynh-Feldt        | 484.381                 | 1.322  | 366.307     | 3.796 | .070 |
|                                  | Lower-bound        | 484.381                 | 1.000  | 484.381     | 3.796 | .087 |
| Error(factor1)                   | Sphericity Assumed | 1020.868                | 16     | 63.804      |       |      |
|                                  | Greenhouse-Geisser | 1020.868                | 8.888  | 114.863     |       |      |
|                                  | Huynh-Feldt        | 1020.868                | 10.579 | 96.502      |       |      |
|                                  | Lower-bound        | 1020.868                | 8.000  | 127.609     |       |      |

factor 1 = WMFT-TIME

*Comment*

The 2-way mixed ANOVA was performed. The WMFT-TIME scores were statistically significant in time,  $F(1.11, 8.89) = 5.15$ ,  $p = 0.047$ . However, the time and group

interactions were not statistically significant, even though there was an increase trend towards the experimental group,  $F(1.11, 8.89) = 3.80$ ,  $p = 0.08$ .

### Supplementary 8. Profile Plots Effects of Combined NIBS/sham on WMFT-TIME

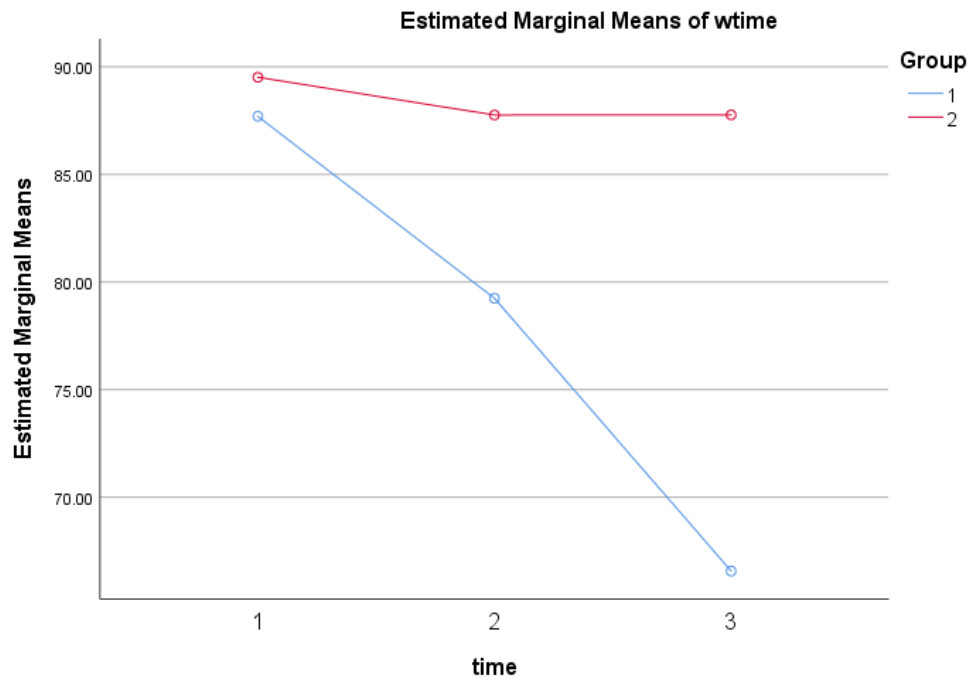

*Group 1 = active, Group 2 = sham, 1 = at baseline, 2 = immediately after stimulation, 3 = 1 week after stimulation*
