# Supplementary material for: Effects of combining two techniques of non-invasive brain stimulation in subacute stroke patients: a pilot study
Source: PubMed Central journal article supplement (PMC8928603; doi:10.1186/s12883-022-02607-3), 2022-03-17

## Additional file 2: CONSORT Flow Diagram of Patients Through the Study

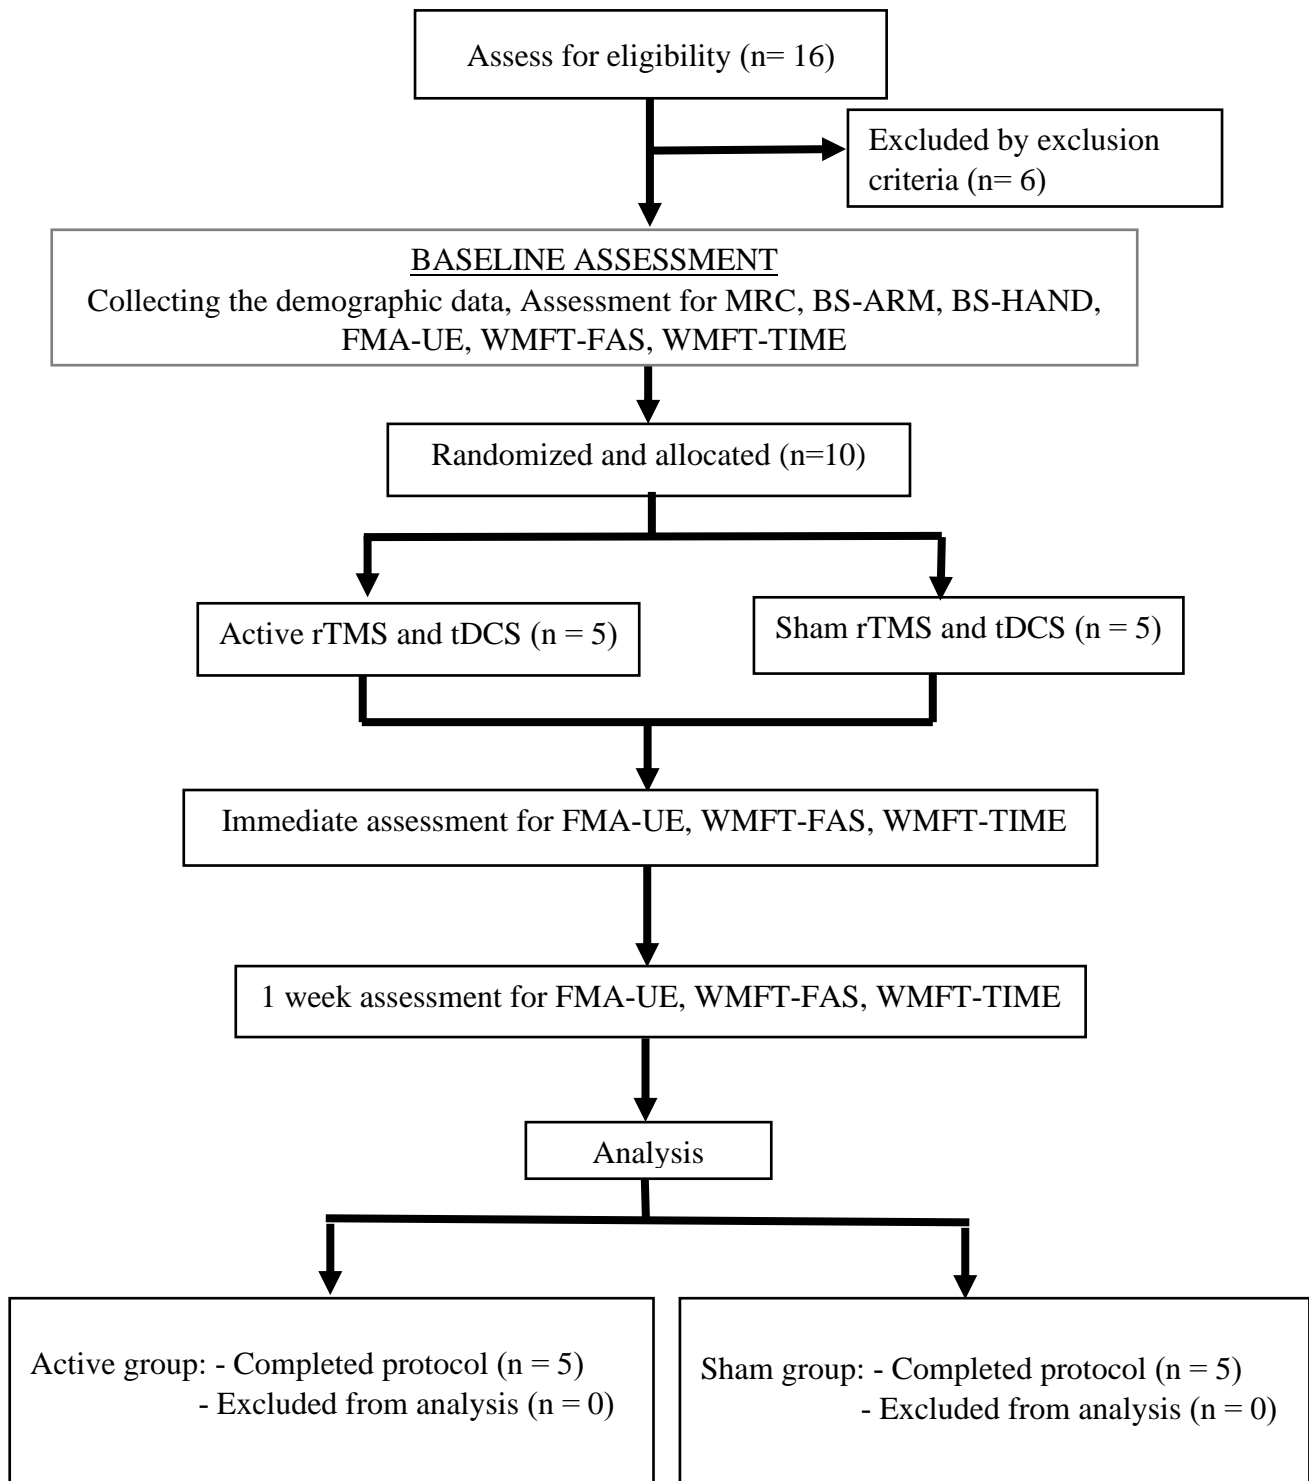

Supplement: 12883_2022_2607_MOESM2_ESM.pdf [file 12883_2022_2607_MOESM2_ESM.pdf]
