# Supplementary material for: Effects of combining two techniques of non-invasive brain stimulation in subacute stroke patients: a pilot study
Source: PubMed Central journal article supplement (PMC8928603; doi:10.1186/s12883-022-02607-3), 2022-03-17
Supplement: 12883_2022_2607_MOESM4_ESM.pdf [file 12883_2022_2607_MOESM4_ESM.pdf]

## Additional file 4\_Registration and Trial protocol

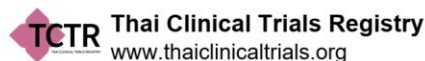

**TCTR ID : TCTR20191027002**

**Overall Recruitment Status : Completed (No Results)**

**OTHER ID :**

**Retrospective registration  
This protocol was registered after enrollment of the first participant.**

### Tracking Information

First Submitted Date : 18 October 2019  
First Posted Date : 27 October 2019  
Last Update Posted Date : 26 October 2019

### Title

**Public Title :** A combined effect of low-frequency repetitive transcranial magnetic stimulation (rTMS) and cathodal transcranial direct current stimulation (tDCS) over non-lesional primary motor cortex on upper limb motor recovery in subacute stroke

**Acronym :** No Data

**Scientific Title :** A combined effect of low-frequency repetitive transcranial magnetic stimulation (rTMS) and cathodal transcranial direct current stimulation (tDCS) over non-lesional primary motor cortex on upper limb motor recovery in subacute stroke

**Sponsor ID/ IRB ID/ EC ID :** IRB/EC ID 409/2014

**Registration Site :** Thai Clinical Trials Registry

**URL :** <https://www.thaiclinicaltrials.org/show/TCTR20191027002>

**Secondary ID :** -

### Ethics Review

1. Board Approval : Submitted, approved

Approval Number : 409/2014

Date of Approval : No Data

Board Name : Research Ethics Office, Faculty of Medicine, Chiang Mai University

Board Affiliation : Faculty of Medicine, Chiang Mai University

Board Contact : Business Phone : 0-5393-6643 Ext. No Data  
Business Email : Researchmed@cmu.ac.th  
Business Address : Faculty of Medicine 110 Si Phum Sub-district, Mueang Chiang Mai District, Chiang Mai 50200

### Sponsor

Source(s) of Monetary or Material Supports : Faculty of Medicine, Chiang Mai University

Study Primary Sponsor : Faculty of Medicine, Chiang Mai University

Responsible Party : Name/Official Title : Faculty of Medicine, Chiang Mai University  
Organization : Chiang Mai University  
Phone : 0-5393-6150 Ext. No Data  
Email : medinfo@cmu.ac.th

Study Secondary Sponsor : N/A

### Protocol Synopsis

Protocol Synopsis :
