# Supplementary material for: Effects of combining two techniques of non-invasive brain stimulation in subacute stroke patients: a pilot study
Source: PubMed Central journal article supplement (PMC8928603; doi:10.1186/s12883-022-02607-3), 2022-03-17
Supplement: 12883_2022_2607_MOESM7_ESM.pdf [file 12883_2022_2607_MOESM7_ESM.pdf]

**Additional file 7\_Subgroup analysis with adjusted baseline**  
**Supplementary 1. Baseline-difference values for timepoints 1 (T1) and 2 (T2)**

**General Linear Model**

**Within-Subjects**

**Factors**

Measure: MEASURE\_1

| fma | Dependent Variable |
|-----|--------------------|
| 1   | dif12              |
| 2   | dif13              |

*fma 1 = active; fma 2 = sham; dif12 = T1-T0; dif13 = T2-T0*

**Descriptive Statistics**

|       | 1     | Mean   | Std. Deviation | N  |
|-------|-------|--------|----------------|----|
| dif12 | 1     | 1.6000 | 2.19089        | 5  |
|       | 2     | .6000  | 1.34164        | 5  |
|       | Total | 1.1000 | 1.79196        | 10 |
| dif13 | 1     | 9.4000 | 3.64692        | 5  |
|       | 2     | 1.8000 | 2.04939        | 5  |
|       | Total | 5.6000 | 4.88080        | 10 |

*dif12 = T1-T0; dif13 = T2-T0; 1-1 = active; 1-2 = sham*

*Comment*

We adjusted the baseline by subtracting T0 from T1 (dif12) and T0 from T2 (dif13).

Data distribution is shown as a mean and standard deviation, as in descriptive statistics.

## Supplementary 2. The 2-way mixed ANOVA of FMA-UE with adjusted baseline

### Tests of Within-Subjects Effects

Measure: MEASURE\_1

| Source      |                    | Type III Sum of Squares | df    | Mean Square | F      | Sig. |
|-------------|--------------------|-------------------------|-------|-------------|--------|------|
| fma         | Sphericity Assumed | 101.250                 | 1     | 101.250     | 28.125 | .001 |
|             | Greenhouse-Geisser | 101.250                 | 1.000 | 101.250     | 28.125 | .001 |
|             | Huynh-Feldt        | 101.250                 | 1.000 | 101.250     | 28.125 | .001 |
|             | Lower-bound        | 101.250                 | 1.000 | 101.250     | 28.125 | .001 |
| fma * group | Sphericity Assumed | 54.450                  | 1     | 54.450      | 15.125 | .005 |
|             | Greenhouse-Geisser | 54.450                  | 1.000 | 54.450      | 15.125 | .005 |
|             | Huynh-Feldt        | 54.450                  | 1.000 | 54.450      | 15.125 | .005 |
|             | Lower-bound        | 54.450                  | 1.000 | 54.450      | 15.125 | .005 |
| Error(fma)  | Sphericity Assumed | 28.800                  | 8     | 3.600       |        |      |
|             | Greenhouse-Geisser | 28.800                  | 8.000 | 3.600       |        |      |
|             | Huynh-Feldt        | 28.800                  | 8.000 | 3.600       |        |      |
|             | Lower-bound        | 28.800                  | 8.000 | 3.600       |        |      |

#### Comment

The overall FMA-UE motor score was statistically significant across two-time points,  $F(1, 8) = 28.125$ ,  $p = 0.001$ , and there was a significant interaction between time and group of experiments,  $F(1, 8) = 15.125$ ,  $p = 0.005$ , implying that the change in scores over time differed between the groups assigned even after the baseline was adjusted.

### Supplementary 3. Post-hoc analysis using Bonferroni adjustment

#### Pairwise Comparisons

Measure: MEASURE\_1

| fma | (I)1 | (J)1 | Mean Difference<br>(I-J) | Std. Error | Sig. <sup>b</sup> | 95% Confidence Interval for<br>Difference <sup>b</sup> |             |
|-----|------|------|--------------------------|------------|-------------------|--------------------------------------------------------|-------------|
|     |      |      |                          |            |                   | Lower Bound                                            | Upper Bound |
| 1   | 1    | 2    | 1.000                    | 1.149      | .409              | -1.649                                                 | 3.649       |
|     | 2    | 1    | -1.000                   | 1.149      | .409              | -3.649                                                 | 1.649       |
| 2   | 1    | 2    | 7.600 <sup>*</sup>       | 1.871      | .004              | 3.286                                                  | 11.914      |
|     | 2    | 1    | -7.600 <sup>*</sup>      | 1.871      | .004              | -11.914                                                | -3.286      |

*fma 1 = T1; fma 2 = T2; (I)1-1 = active; (J)1-2 = sham*

#### Comment

Pairwise comparisons between groups using Bonferroni's correction, found that FM-UE of the active group [(I)1-1] had a significantly higher motor score only at 1 week after stimulation (T2),  $p = .004$ , as compared to sham [(J)1-2] after baseline adjustment.
